# Supplementary material
Source: PubMed Central journal article supplement (PMC2077885)
Supplement: neo0911_0938SD1.pdf [file neo0911_0938SD1.pdf]

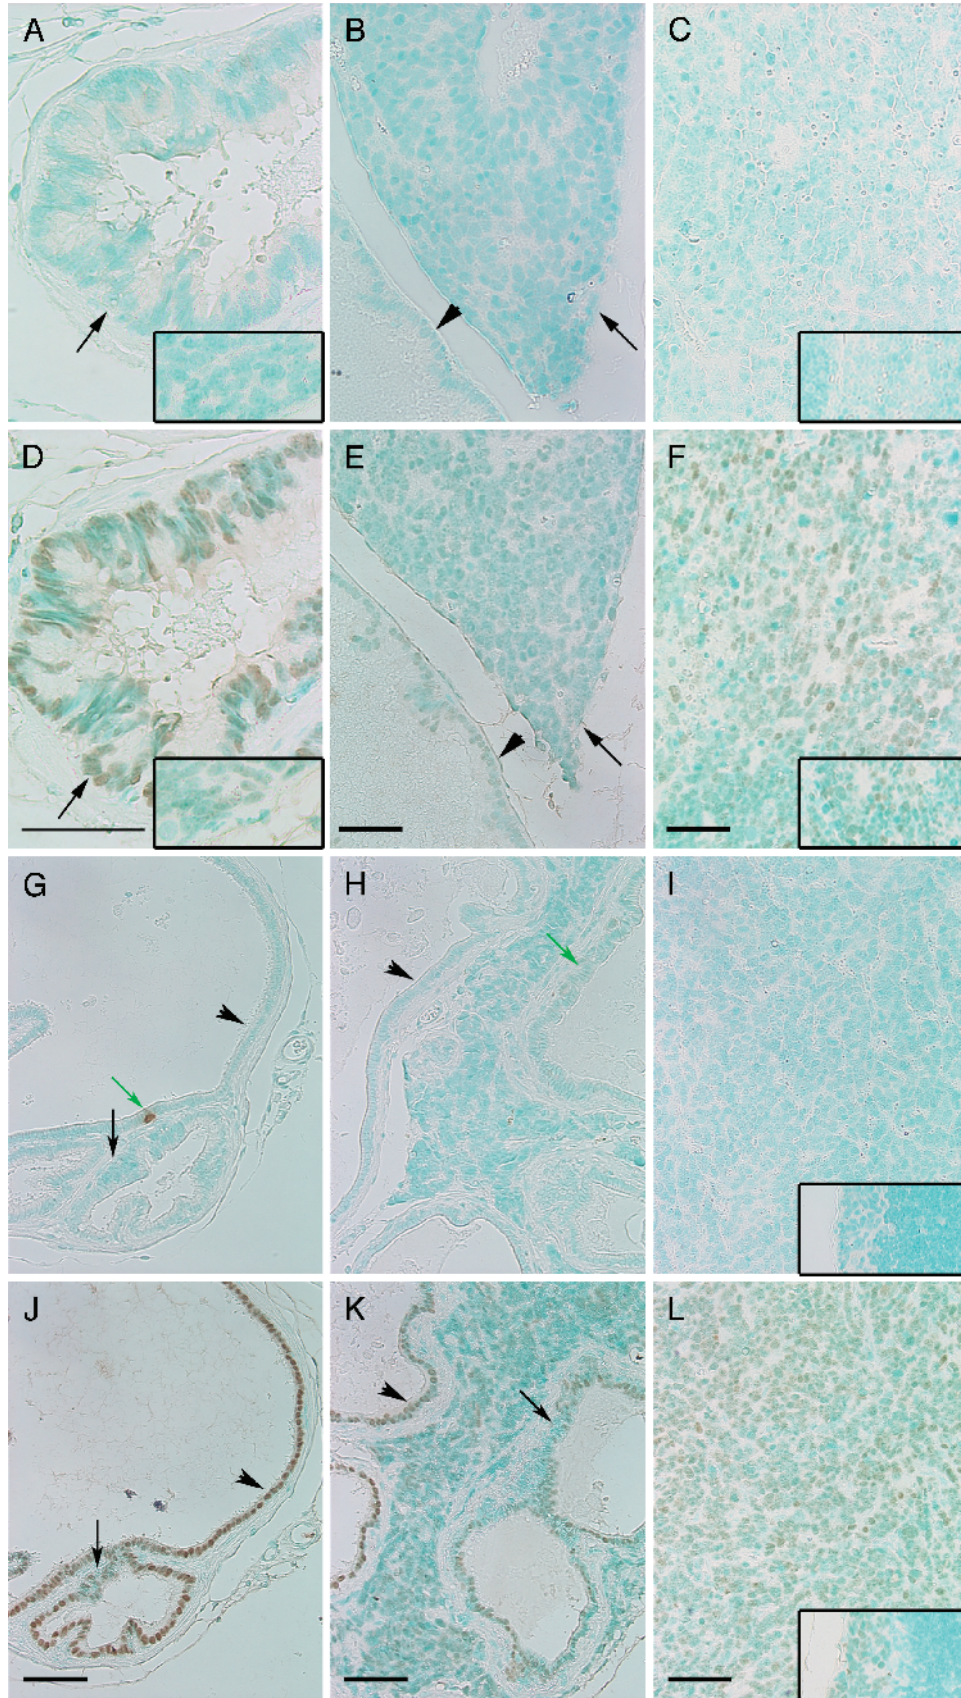

**Figure W1.** Serial sections from Figures 5 and 6 of intraglandular foci, microscopic, and macroscopic tumors from intact TRAMP mice (A–F) and castrated TRAMP mice (G–L). Serial sections were immunostained for serotonin (A–C; G–I) or Foxa1 (D–F; J–L). Arrows indicate synaptophysin-, SV40-Tag-, and Foxa2-expressing intraglandular foci. Arrowheads indicate synaptophysin- and Foxa2-negative areas. Green arrow indicates serotonin-expressing cell. Scale bar, 20  $\mu$ m.
